# Supplementary material for: Cost-effective downstream processing of recombinantly produced pexiganan peptide and its antimicrobial activity
Source: PubMed Central journal article supplement (PMC5783979; doi:10.1186/s13568-018-0541-3), 2018-01-24
Supplement: 13568_2018_541_MOESM1_ESM.pdf [file 13568_2018_541_MOESM1_ESM.pdf]

## **Supporting Information**

### **Cost-effective downstream processing of recombinantly produced pexiganan peptide and its antimicrobial activity**

Baode Sun<sup>1</sup>, David Wibowo<sup>1\*</sup>, Anton P.J. Middelberg<sup>2</sup>, Chun-Xia Zhao<sup>1\*</sup>

*<sup>1</sup>Australian Institute for Bioengineering and Nanotechnology, The University of Queensland, St Lucia, QLD 4072, Australia. <sup>2</sup>Faculty of Engineering, Computer, and Mathematical Sciences, The University of Adelaide, Adelaide, SA 5005, Australia.*

\*Correspondence to: D. Wibowo; C.-X Zhao

Telephones: +61-7-3346-4267 (D. Wibowo); +61-7-3346-4263 (C.-X Zhao)

E-mails: [d.wibowo@uq.edu.au](mailto:d.wibowo@uq.edu.au) (D. Wibowo); [z.chunxia@uq.edu.au](mailto:z.chunxia@uq.edu.au) (C.-X Zhao)

ORCID: 0000-0001-6919-3355 (D. Wibowo); 0000-0002-3365-3759 (C.-X Zhao)

#### **Acknowledgments**

This research was supported by the Australian Research Council (ARC) under Discovery Project (DP150100798). C.-X.Z. acknowledges financial support from the award of the ARC Future Fellowship (FT140100726).

## Figures Legends

**Figure S1.** Photographs of *E. coli* growth on agar plates containing of: (a) water; (b) DAMP4 protein; (c) DAMP4<sub>var</sub>-pexiganan protein; (d) synthetic pexiganan peptide; and (e) bio-produced pexiganan peptide. The concentration of all protein/peptide samples was 1 µg/mL.

**Figure S2.** Photographs of *E. coli* growth on agar plates containing of: (a) water; (b) DAMP4 protein; (c) DAMP4<sub>var</sub>-pexiganan protein; (d) synthetic pexiganan peptide; and (e) bio-produced pexiganan peptide. The concentration of all protein/peptide samples was 2 µg/mL.

**Figure S3.** Photographs of *E. coli* growth on agar plates containing of: (a) water; (b) DAMP4 protein; (c) DAMP4<sub>var</sub>-pexiganan protein; (d) synthetic pexiganan peptide; and (e) bio-produced pexiganan peptide. The concentration of all protein/peptide samples was 4 µg/mL.

**Figure S4.** Photographs of *E. coli* growth on agar plates containing of: (a) water; (b) DAMP4 protein; (c) DAMP4<sub>var</sub>-pexiganan protein; (d) synthetic pexiganan peptide; and (e) bio-produced pexiganan peptide. The concentration of all protein/peptide samples was 8 µg/mL.

**Figure S5.** Photographs of *E. coli* growth on agar plates containing of: (a) water; (b) DAMP4 protein; (c) DAMP4<sub>var</sub>-pexiganan protein; (d) synthetic pexiganan peptide; and (e) bio-produced pexiganan peptide. The concentration of all protein/peptide samples was 32 µg/mL.

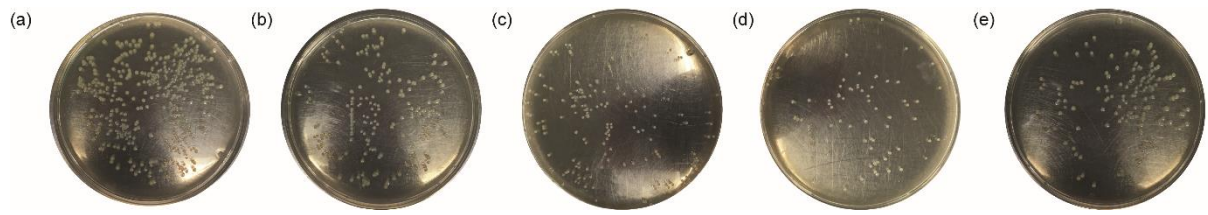

**Figure S1.** Photographs of *E. coli* growth on agar plates containing of: (a) water; (b) DAMP4 protein; (c) DAMP4<sub>var</sub>-pexiganan protein; (d) synthetic pexiganan peptide; and (e) bio-produced pexiganan peptide. The concentration of all protein/peptide samples was 1  $\mu\text{g}/\text{mL}$ .

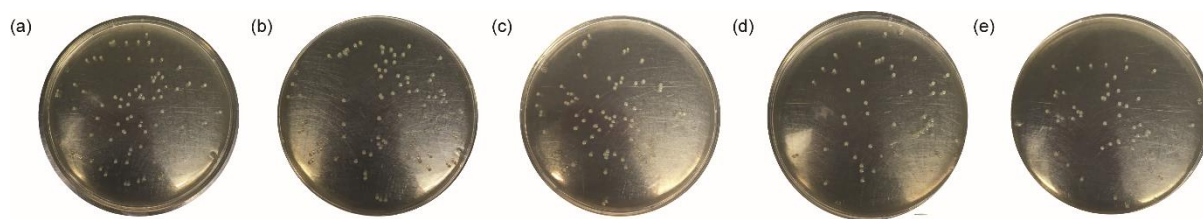

**Figure S2.** Photographs of *E. coli* growth on agar plates containing of: (a) water; (b) DAMP4 protein; (c) DAMP4<sub>var</sub>-pexiganan protein; (d) synthetic pexiganan peptide; and (e) bio-produced pexiganan peptide. The concentration of all protein/peptide samples was 2  $\mu\text{g/mL}$ .

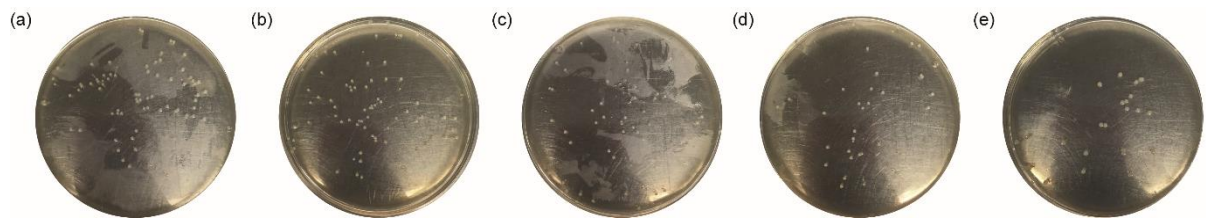

**Figure S3.** Photographs of *E. coli* growth on agar plates containing of: (a) water; (b) DAMP4 protein; (c) DAMP4<sub>var</sub>-pexiganan protein; (d) synthetic pexiganan peptide; and (e) bio-produced pexiganan peptide. The concentration of all protein/peptide samples was 4  $\mu\text{g/mL}$ .

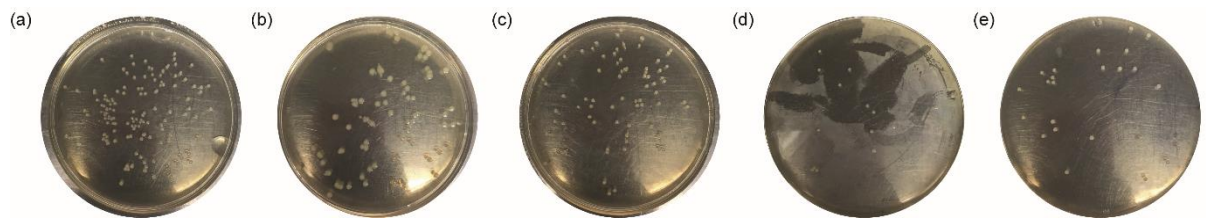

**Figure S4.** Photographs of *E. coli* growth on agar plates containing of: (a) water; (b) DAMP4 protein; (c) DAMP4<sub>var</sub>-pexiganan protein; (d) synthetic pexiganan peptide; and (e) bio-produced pexiganan peptide. The concentration of all protein/peptide samples was 8 μg/mL.

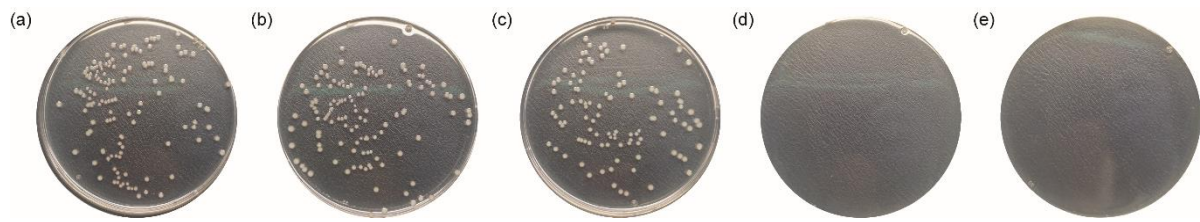

**Figure S5.** Photographs of *E. coli* growth on agar plates containing of: (a) water; (b) DAMP4 protein; (c) DAMP4<sub>var</sub>-pexiganan protein; (d) synthetic pexiganan peptide; and (e) bio-produced pexiganan peptide. The concentration of all protein/peptide samples was 32  $\mu\text{g/mL}$ .
